# Supplementary material for: Impact of team-based community healthcare on preventable hospitalisation: a population-based cohort study in Taiwan
Source: HighWire-hosted journal article supplement (doi:10.1136/bmjopen-2020-039986), 2021-02-01
Supplement: bmjopen-2020-039986supp001_data_supplement.pdf [file bmjopen-2020-039986supp001_data_supplement.pdf]

## Supplement

### Appendix 1. Quality assessment indicators for CHCG

CHCG: Community HealthCare Group

NHIA: National Health Insurance Administration (Taiwan)

For each scoring item failed, the score is calculated by the proportion of achievement of the benchmark. The quality assessment is passed if the total score reaches 90 out of 100 (full score).

- 1 Management indicators (weighting = 30%)
  - 1.1 Registration of all NHIA-assigned patients; must be 100%.
  - 1.2 Participation once a month in the case discussion seminar, the combined care clinic, the community healthcare education, or the ward round in backup hospital(s).
  - 1.3 Providing a twenty-four hour consultation hotline for NHIA-assigned patients (tested 6 times per year)
- 2 Clinical indicators (weighting = 40%)
  - 2.1 Rate of emergency department visits (excluding trauma): should be lower than the median of all eligible patients selected by NHIA.
  - 2.2 Rate of hospitalization due to pneumonia, coronary artery disease, diabetes related complications, chronic obstructive pulmonary disease, or urinary tract infection: should be lower than the median of all eligible patients selected by NHIA.
  - 2.3 Rate of needle injection (excluding insulin injection and vaccination): should be lower than the median of all eligible patients selected by NHIA.
  - 2.4 Rate of antibiotics use: should be lower than the median of all eligible patients selected by NHIA.
- 3 Feedbacks from participants (weighting = 30%)
  - 3.1 Patient satisfaction survey by phone: should be higher than 80/100
  - 3.2 Compliance of healthcare policies
    - 3.2.1 Rate of providing adult health examination for patients over 40: should be higher than the median of all eligible patients selected by NHIA.
    - 3.2.2 Rate of providing Pap smear for women over 30: should be higher than the median of all eligible patients selected by NHIA.
    - 3.2.3 Rate of providing influenza vaccination for patients over 65: should be higher than the median of all eligible patients selected by NHIA.

## Appendix 2. Diagnostic codes used in this study

|                                                                                           | Disease                                        | ICD-9-CM                                                                                                                                                                 | ICD-10-CM                                                                                                                                                                                                                   |
|-------------------------------------------------------------------------------------------|------------------------------------------------|--------------------------------------------------------------------------------------------------------------------------------------------------------------------------|-----------------------------------------------------------------------------------------------------------------------------------------------------------------------------------------------------------------------------|
| Ambulatory care sensitive conditions                                                      | Chronic obstructive pulmonary disease / Asthma | 490-496                                                                                                                                                                  | J40-J47                                                                                                                                                                                                                     |
|                                                                                           | Diabetes                                       | 250                                                                                                                                                                      | E10, E11, E13                                                                                                                                                                                                               |
|                                                                                           | Heart failure / pulmonary edema                | 428, 518.4                                                                                                                                                               | I50, J81                                                                                                                                                                                                                    |
| Diagnoses of other comorbidities                                                          | Hyperlipidemia                                 | 272                                                                                                                                                                      | E78                                                                                                                                                                                                                         |
|                                                                                           | Atherosclerosis                                | 440                                                                                                                                                                      | I70                                                                                                                                                                                                                         |
|                                                                                           | Atrial fibrillation                            | 427                                                                                                                                                                      | I48                                                                                                                                                                                                                         |
|                                                                                           | Coronary artery disease                        | 414                                                                                                                                                                      | I25                                                                                                                                                                                                                         |
|                                                                                           | Embolism                                       | 444                                                                                                                                                                      | I74                                                                                                                                                                                                                         |
|                                                                                           | Thyroid disorders                              | 240-246                                                                                                                                                                  | E00-E07, E35                                                                                                                                                                                                                |
|                                                                                           | Chronic hepatitis B or C                       | 571.4, 070.20, 070.22, 070.30, 070.32, V02.61, 070.41, 070.44, 070.51, 070.54, V02.62                                                                                    | B18, K73.8, K73.9                                                                                                                                                                                                           |
|                                                                                           | Liver cirrhosis                                | 571.2, 571.5, 571.6                                                                                                                                                      | K70.3, K74.0, K74.3-K74.6                                                                                                                                                                                                   |
|                                                                                           | Gout                                           | 274                                                                                                                                                                      | M10                                                                                                                                                                                                                         |
|                                                                                           | Chronic kidney disease                         | 403.01, 403.11, 403.91, 404.02, 404.03, 404.12, 404.13, 404.92, 404.93, 585, V45.1, V56                                                                                  | N18, I12.0, I13.11, I13.2, Z91.15, Z99.2, Z49                                                                                                                                                                               |
|                                                                                           | Benign prostate hyperplasia                    | 600                                                                                                                                                                      | N40, N42.83                                                                                                                                                                                                                 |
|                                                                                           | Anemia                                         | 280-285                                                                                                                                                                  | D50-D64, D47.4                                                                                                                                                                                                              |
|                                                                                           | Osteoporosis                                   | 733.0, 733.1                                                                                                                                                             | M80, M81                                                                                                                                                                                                                    |
|                                                                                           | Depression                                     | 296.2, 296.3, 298.0, 300.4, 309.0, 309.1, 293.83, 296.90, 309.28, 296.82, 311                                                                                            | F32, F33, F34.1, F43.21, F43.23, F06.30, F06.31, F06.32, F39                                                                                                                                                                |
|                                                                                           | Seizure / Epilepsy                             | 345                                                                                                                                                                      | G40, G41                                                                                                                                                                                                                    |
|                                                                                           | Hypertension                                   | 401-404                                                                                                                                                                  | I10-I11                                                                                                                                                                                                                     |
|                                                                                           | Angina                                         | 413, 414.0, 414.8                                                                                                                                                        | I20, I23, I24                                                                                                                                                                                                               |
| Diagnoses for Charlson comorbidity index                                                  | Myocardial infarction                          | 410, 412                                                                                                                                                                 | I21, I22, I252                                                                                                                                                                                                              |
|                                                                                           | Congestive heart failure                       | 428                                                                                                                                                                      | I50                                                                                                                                                                                                                         |
|                                                                                           | Peripheral vascular disease                    | 441, 443.9, 785.4, V43.4                                                                                                                                                 | I71, I790, I739, I96, Z958, Z959                                                                                                                                                                                            |
|                                                                                           | Cerebral vascular accident                     | 430-438                                                                                                                                                                  | I60, I61, I62, I63, I65, I66, G450, G451, G452, G458, G459, G46, I64, G454, I670, I671, I672, I674, I675, I676, I677, I678, I679, I681, I682, I688, I69                                                                     |
|                                                                                           | Dementia                                       | 290                                                                                                                                                                      | F00, F01, F02, F051                                                                                                                                                                                                         |
|                                                                                           | Pulmonary disease                              | 490, 491, 492, 493, 494, 495, 496, 500, 501, 502, 503, 504, 505                                                                                                          | J40, J41, J42, J44, J43, J45, J46, J47, J67, J44, J60, J61, J62, J63, J66, J64, J65                                                                                                                                         |
|                                                                                           | Connective tissue disorder                     | 710.0, 710.1, 710.4, 714.0, 714.1, 714.2, 714.81, 517.1, 725                                                                                                             | M32, M34, M332, M053, M058, M059, M060, M063, M069, M050, M052, M051, M353                                                                                                                                                  |
|                                                                                           | Peptic ulcer                                   | 531, 532, 533, 534                                                                                                                                                       | K25, K26, K27, K28                                                                                                                                                                                                          |
|                                                                                           | Liver disease                                  | 571.2, 571.4, 571.5, 571.6                                                                                                                                               | K702, K703, K73, K717, K740, K742, K746, K743, K744, K745                                                                                                                                                                   |
|                                                                                           | Diabetes                                       | 250                                                                                                                                                                      | E109, E119, E139, E149, E101, E111, E131, E141, E105, E115, E135, E145                                                                                                                                                      |
|                                                                                           | Diabetes complications                         | 250.4, 250.5, 250.6                                                                                                                                                      | E102, E112, E132, E142, E103, E113, E133, E143, E104, E114, E134, E144                                                                                                                                                      |
|                                                                                           | Paraplegia                                     | 342, 344.1                                                                                                                                                               | G81, G041, G820, G821, G822                                                                                                                                                                                                 |
|                                                                                           | Renal disease                                  | 582, 583.0, 583.1, 583.2, 583.3, 583.5, 583.6, 583.7, 583.4, 585, 586, 588                                                                                               | N03, N052, N053, N054, N055, N056, N072, N073, N074, N01, N18, N19, N25                                                                                                                                                     |
|                                                                                           | Cancer                                         | 14, 15, 16, 18, 170, 171, 172, 174, 175, 176, 179, 190, 191, 192, 193, 194, 195.0, 195.1, 195.2, 195.3, 195.4, 195.5, 195.8, 200, 201, 202, 203, 204, 205, 206, 207, 208 | C0, C1, C2, C3, C40, C41, C43, C45, C46, C47, C48, C49, C5, C6, C70, C71, C72, C73, C74, C75, C76, C80, C81, C82, C83, C84, C85, C883, C887, C889, C900, C901, C91, C92, C93, C940, C941, C942, C943, C9451, C947, C95, C96 |
|                                                                                           | Metastatic cancer                              | 196, 197, 198, 199.0, 199.1                                                                                                                                              | C77, C78, C79, C80                                                                                                                                                                                                          |
|                                                                                           | Severe liver disease                           | 572.2, 572.3, 572.4, 572.8                                                                                                                                               | K729, K766, K767, K721                                                                                                                                                                                                      |
|                                                                                           | Acquired immune deficiency syndrome            | 042                                                                                                                                                                      | B20, B21, B22, B23, B24                                                                                                                                                                                                     |
| Diagnosis definition for comorbidities: Outpatient department _2 in the previous one year |                                                |                                                                                                                                                                          |                                                                                                                                                                                                                             |

### Appendix 3. Characteristics of study base at enrolment

|                       | FPICP Participants |                      |                    |                      |                      | Non-participants     |                      |                      |                      |                      |
|-----------------------|--------------------|----------------------|--------------------|----------------------|----------------------|----------------------|----------------------|----------------------|----------------------|----------------------|
| Fiscal year           | 2011               | 2012                 | 2013               | 2014                 | 2015                 | 2011                 | 2012                 | 2013                 | 2014                 | 2015                 |
| Number of observation | 1,304,979          | 1,947,402            | 1,823,209          | 2,011,578            | 2,316,114            | 2,634,985            | 3,355,140            | 3,119,420            | 3,302,801            | 3,021,262            |
| Sex                   |                    |                      |                    |                      |                      |                      |                      |                      |                      |                      |
| Female                | 704,689<br>(54.0%) | 1,053,544<br>(54.1%) | 975,417<br>(53.5%) | 1,080,217<br>(53.7%) | 1,241,437<br>(53.6%) | 1,399,177<br>(53.1%) | 1,791,645<br>(53.4%) | 1,634,576<br>(52.4%) | 1,743,879<br>(52.8%) | 1,613,354<br>(53.4%) |
| Male                  | 600,290<br>(46.0%) | 893,858<br>(45.9%)   | 847,792<br>(46.5%) | 933,361<br>(46.3%)   | 1,074,677<br>(46.4%) | 1,235,808<br>(46.9%) | 1,563,495<br>(46.6%) | 1,484,844<br>(47.6%) | 1,558,922<br>(47.2%) | 1,407,908<br>(46.6%) |
| Age (year)*           |                    |                      |                    |                      |                      |                      |                      |                      |                      |                      |
| 5-10                  | 143,879<br>(11.0%) | 209,173<br>(10.7%)   | 174,461<br>(9.6%)  | 198,595<br>(9.9%)    | 222,703<br>(9.6%)    | 268,352<br>(10.2%)   | 346,591<br>(10.3%)   | 268,860<br>(8.6%)    | 271,793<br>(8.2%)    | 239,933<br>(7.9%)    |
| 10-20                 | 115,103<br>(8.8%)  | 215,448<br>(11.1%)   | 201,301<br>(11.0%) | 230,627<br>(11.5%)   | 252,397<br>(10.9%)   | 228,384<br>(8.7%)    | 321,579<br>(9.6%)    | 323,927<br>(10.4%)   | 313,078<br>(9.5%)    | 303,073<br>(10.0%)   |
| 20-30                 | 80,572<br>(6.2%)   | 133,871<br>(6.9%)    | 111,195<br>(6.1%)  | 140,939<br>(7.0%)    | 155,892<br>(6.7%)    | 159,869<br>(6.1%)    | 200,094<br>(6.0%)    | 158,724<br>(5.1%)    | 168,580<br>(5.1%)    | 161,008<br>(5.3%)    |
| 30-40                 | 138,123<br>(10.6%) | 219,632<br>(11.3%)   | 187,881<br>(10.3%) | 230,627<br>(11.5%)   | 259,820<br>(11.2%)   | 256,932<br>(9.8%)    | 318,006<br>(9.5%)    | 275,338<br>(8.8%)    | 302,757<br>(9.2%)    | 287,288<br>(9.5%)    |
| 40-50                 | 174,093<br>(13.3%) | 261,466<br>(13.4%)   | 231,975<br>(12.7%) | 260,523<br>(13.0%)   | 291,989<br>(12.6%)   | 319,738<br>(12.1%)   | 385,895<br>(11.5%)   | 349,841<br>(11.2%)   | 371,565<br>(11.3%)   | 344,114<br>(11.4%)   |
| 50-60                 | 215,818<br>(16.5%) | 315,851<br>(16.2%)   | 302,910<br>(16.6%) | 335,263<br>(16.7%)   | 381,070<br>(16.5%)   | 425,366<br>(16.1%)   | 528,819<br>(15.8%)   | 492,370<br>(15.8%)   | 536,705<br>(16.3%)   | 486,180<br>(16.1%)   |
| 60-70                 | 165,460<br>(12.7%) | 242,641<br>(12.5%)   | 241,561<br>(13.2%) | 277,606<br>(13.8%)   | 351,376<br>(15.2%)   | 356,851<br>(13.5%)   | 468,076<br>(14.0%)   | 437,302<br>(14.0%)   | 540,146<br>(16.4%)   | 524,064<br>(17.3%)   |
| 70-80                 | 155,389<br>(11.9%) | 204,990<br>(10.5%)   | 207,052<br>(11.4%) | 207,137<br>(10.3%)   | 249,923<br>(10.8%)   | 348,286<br>(13.2%)   | 443,064<br>(13.2%)   | 427,584<br>(13.7%)   | 481,658<br>(14.6%)   | 423,040<br>(14.0%)   |
| 80-90                 | 99,276<br>(7.6%)   | 123,412<br>(6.3%)    | 139,952<br>(7.7%)  | 111,043<br>(5.5%)    | 131,147<br>(5.7%)    | 231,239<br>(8.8%)    | 292,994<br>(8.7%)    | 327,167<br>(10.5%)   | 271,793<br>(8.2%)    | 217,834<br>(7.2%)    |

|                         |                    |                    |                    |                    |                      |                      |                      |                      |                      |                      |
|-------------------------|--------------------|--------------------|--------------------|--------------------|----------------------|----------------------|----------------------|----------------------|----------------------|----------------------|
| over 90                 | 17,266<br>(1.4%)   | 20,918<br>(1.1%)   | 24,921<br>(1.4%)   | 19,218<br>(0.8%)   | 19,797<br>(0.8%)     | 39,968<br>(1.5%)     | 50,022<br>(1.4%)     | 58,307<br>(1.9%)     | 44,726<br>(1.2%)     | 34,728<br>(1.3%)     |
| <b>Monthly Income†‡</b> |                    |                    |                    |                    |                      |                      |                      |                      |                      |                      |
| Level 1 (high)          | 441,083<br>(33.8%) | 669,906<br>(34.4%) | 627,184<br>(34.4%) | 710,087<br>(35.3%) | 826,853<br>(35.7%)   | 880,085<br>(33.4%)   | 1,137,392<br>(33.9%) | 1,066,842<br>(34.2%) | 1,155,981<br>(35.0%) | 1,078,591<br>(35.7%) |
| Level 2 (medium)        | 480,232<br>(36.8%) | 703,012<br>(36.1%) | 663,648<br>(36.4%) | 710,087<br>(35.3%) | 817,588<br>(35.3%)   | 998,659<br>(37.9%)   | 1,258,178<br>(37.5%) | 1,179,141<br>(37.8%) | 1,222,036<br>(37.0%) | 1,102,761<br>(36.5%) |
| Level 3 (low)           | 383,664<br>(29.4%) | 574,484<br>(29.5%) | 532,377<br>(29.2%) | 591,404<br>(29.4%) | 671,673<br>(29.0%)   | 756,241<br>(28.7%)   | 959,570<br>(28.6%)   | 873,437<br>(28.0%)   | 924,784<br>(28.0%)   | 839,910<br>(27.8%)   |
| <b>Urbanization‡</b>    |                    |                    |                    |                    |                      |                      |                      |                      |                      |                      |
| Level 1 (high)          | 288,400<br>(22.1%) | 447,902<br>(23.0%) | 421,161<br>(23.1%) | 470,709<br>(23.4%) | 528,074<br>(22.8%)   | 685,096<br>(26.0%)   | 848,850<br>(25.3%)   | 789,213<br>(25.3%)   | 852,123<br>(25.8%)   | 797,613<br>(26.4%)   |
| Level 2 (medium)        | 619,865<br>(47.5%) | 923,069<br>(47.4%) | 856,908<br>(47.0%) | 957,511<br>(47.6%) | 1,100,154<br>(47.5%) | 1,111,964<br>(42.2%) | 1,449,420<br>(43.2%) | 1,341,351<br>(43.0%) | 1,440,021<br>(43.6%) | 1,326,334<br>(43.9%) |
| Level 3 (low)           | 396,714<br>(30.4%) | 576,431<br>(29.6%) | 545,140<br>(29.9%) | 583,358<br>(29.0%) | 687,886<br>(29.7%)   | 837,925<br>(31.8%)   | 1,056,870<br>(31.5%) | 988,856<br>(31.7%)   | 1,010,657<br>(30.6%) | 897,315<br>(29.7%)   |

FPICP, Taiwan's Family Practice Integrated Care Project.

\* Age at enrollment

† Counted in New Taiwan Dollar (NTD)

‡ Categorized by tertiles

#### Appendix 4. Comorbidities and utilization of medical resource among patients with ACSC, by FPICP participation

|                              | FPICP Participants  |                     |                    |                    |                    | Non-participants    |                     |                     |                     |                    |
|------------------------------|---------------------|---------------------|--------------------|--------------------|--------------------|---------------------|---------------------|---------------------|---------------------|--------------------|
| Fiscal year                  | 2011                | 2012                | 2013               | 2014               | 2015               | 2011                | 2012                | 2013                | 2014                | 2015               |
| Number of observation        | 193,098             | 287,640             | 295,499            | 284,819            | 366,047            | 374,464             | 538,477             | 522,685             | 587,682             | 481,600            |
| CCI                          |                     |                     |                    |                    |                    |                     |                     |                     |                     |                    |
| High (>2)                    | 24,403<br>(12.6)    | 35,532<br>(12.4)    | 41,504<br>(14.0)   | 38,240<br>(13.4)   | 52,656<br>(14.4)   | 53,782<br>(14.4)    | 71,895<br>(13.4)    | 78,108<br>(14.9)    | 93,334<br>(15.9)    | 76,019<br>(15.8)   |
| Low (0-2)                    | 168,695<br>(87.4)   | 252,108<br>(87.6)   | 253,995<br>(86.0)  | 246,579<br>(86.6)  | 313,391<br>(85.6)  | 320,682<br>(85.6)   | 466,582<br>(86.6)   | 444,577<br>(85.1)   | 494,348<br>(84.1)   | 405,581<br>(84.2)  |
| Clinic / outpatient care     |                     |                     |                    |                    |                    |                     |                     |                     |                     |                    |
| Number of visits / year      | 17.1<br>(14.0)      | 14.3<br>(13.0)      | 13.4<br>(12.8)     | 13.3<br>(12.5)     | 12.6<br>(12.1)     | 19.3<br>(15.5)      | 16.5<br>(14.5)      | 14.9<br>(14.3)      | 14.2<br>(13.7)      | 14.0<br>(13.3)     |
| Medical cost / year (point)* | 11,515<br>(19,506)  | 9,559<br>(19,743)   | 9,221<br>(23,560)  | 9,568<br>(23,877)  | 9,458<br>(67,589)  | 13,094<br>(22,212)  | 11,278<br>(44,407)  | 10,412<br>(29,223)  | 10,518<br>(26,420)  | 10,655<br>(34,250) |
| Emergency care               |                     |                     |                    |                    |                    |                     |                     |                     |                     |                    |
| Number of visits / year      | 0.53<br>(1.41)      | 0.49<br>(1.39)      | 0.47<br>(1.32)     | 0.43<br>(1.94)     | 0.43<br>(1.49)     | 0.57<br>(1.49)      | 0.54<br>(1.55)      | 0.52<br>(1.40)      | 0.46<br>(1.39)      | 0.45<br>(1.44)     |
| Medical cost / year (point)  | 1,427<br>(5,002)    | 1,321<br>(4,917)    | 1,349<br>(5,213)   | 1,268<br>(5,141)   | 1,365<br>(5,670)   | 1,670<br>(15,513)   | 1,511<br>(5,684)    | 1,538<br>(5,412)    | 1,447<br>(5,747)    | 1,541<br>(7,400)   |
| Inpatient care               |                     |                     |                    |                    |                    |                     |                     |                     |                     |                    |
| Number of visits / year      | 0.34<br>(0.96)      | 0.31<br>(0.92)      | 0.31<br>(0.86)     | 0.30<br>(0.83)     | 0.30<br>(0.77)     | 0.39<br>(1.04)      | 0.36<br>(0.97)      | 0.36<br>(0.94)      | 0.35<br>(0.87)      | 0.35<br>(0.85)     |
| Medical cost / year (point)  | 20,267<br>(110,847) | 18,157<br>(101,410) | 18,786<br>(98,339) | 18,793<br>(95,087) | 18,341<br>(91,482) | 25,064<br>(126,771) | 22,029<br>(115,683) | 23,012<br>(112,184) | 22,768<br>(104,896) | 22,733<br>(96,611) |
| Hospitalization rate         | 17.8%               | 16.3%               | 16.4%              | 16.3%              | 16.3%              | 19.8%               | 18.6%               | 18.6%               | 18.6%               | 18.6%              |
| Length of stay (day)         | 19.5<br>(59.5)      | 18.9<br>(59.1)      | 18.2<br>(48.1)     | 17.8<br>(44.8)     | 16.7<br>(39.4)     | 21.3<br>(64.4)      | 19.7<br>(54.9)      | 19.6<br>(49.2)      | 18.6<br>(42.9)      | 17.7<br>(35.5)     |

ACSC: Ambulatory care sensitive conditions; FPICP, Taiwan's Family Practice Integrated Care Project; CCI, Charlson comorbidity index.

Standard deviation or percentage is shown in parentheses.

\* Floating point value (1 point ~ NT\$0.9) under global budget scheme since 2001

## Appendix 5. Associations between FPICP and ACSC

### A FPICP and hospitalization for COPD / asthma

| Fiscal year | Absolute rate reduction, % (95% CI) | Odds ratio (95% CI) |
|-------------|-------------------------------------|---------------------|
| 2011        | 6.4 (4.8, 8.0)                      | 0.91 (0.87, 0.95)   |
| 2012        | 9.3 (8.1, 10.5)                     | 0.85 (0.82, 0.88)   |
| 2013        | 9.4 (8.2, 10.6)                     | 0.86 (0.82, 0.89)   |
| 2014        | 10.0 (8.8, 11.2)                    | 0.85 (0.81, 0.88)   |
| 2015        | 8.6 (7.4, 9.8)                      | 0.91 (0.87, 0.94)   |

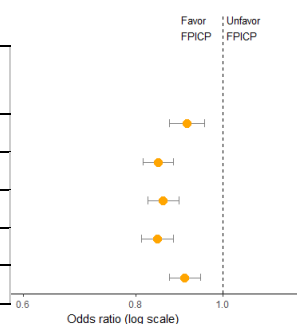

### B FPICP and hospitalization for diabetes / complications

| Fiscal year | Absolute rate reduction, % (95% CI) | Odds ratio (95% CI) |
|-------------|-------------------------------------|---------------------|
| 2011        | 3.2 (2.3, 4.1)                      | 0.86 (0.81, 0.91)   |
| 2012        | 2.5 (1.8, 3.2)                      | 0.86 (0.82, 0.91)   |
| 2013        | 2.3 (1.6, 3.0)                      | 0.86 (0.82, 0.90)   |
| 2014        | 2.4 (1.8, 3.0)                      | 0.87 (0.82, 0.92)   |
| 2015        | 1.9 (1.3, 2.5)                      | 0.87 (0.83, 0.92)   |

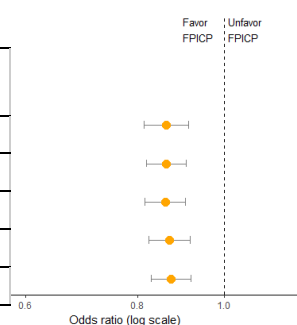

### C FPICP and hospitalization for heart failure

| Fiscal year | Absolute rate reduction, % (95% CI) | Odds ratio (95% CI) |
|-------------|-------------------------------------|---------------------|
| 2011        | 3.9 (-1.2, 9.0)                     | 0.92 (0.82, 1.03)   |
| 2012        | 7.8 (3.3, 12.3)                     | 0.84 (0.76, 0.94)   |
| 2013        | 2.8 (-1.7, 7.3)                     | 0.95 (0.86, 1.04)   |
| 2014        | 4.7 (0.0, 9.4)                      | 0.94 (0.85, 1.04)   |
| 2015        | 2.0 (-2.5, 6.5)                     | 0.97 (0.88, 1.07)   |

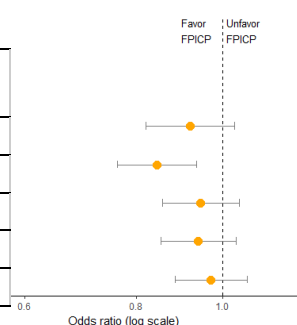

ACSC: Ambulatory care sensitive conditions; COPD, chronic obstructive pulmonary disease; FPICP, Taiwan's Family Practice Integrated Care Project

The odds ratios and 95% confidence interval (in parentheses) were estimated using conditional logistic regressions. Other independent variables for adjusted odds ratios include age, gender, and comorbidities.

## Appendix 6. Eligibility criteria for patients in Family Practice Integrated Care Project (FPICP)

| Year | Criteria                                                                                                                                                                                                                                                                                                                                                                                                                                                                                                                                                                                                                        |
|------|---------------------------------------------------------------------------------------------------------------------------------------------------------------------------------------------------------------------------------------------------------------------------------------------------------------------------------------------------------------------------------------------------------------------------------------------------------------------------------------------------------------------------------------------------------------------------------------------------------------------------------|
| 2011 | <ol style="list-style-type: none"> <li>1. Chronic disease* cases: select the highest 60th percentile based on medical expenses</li> <li>2. Non-chronic disease cases: select the highest 20th percentile based on medical expenses</li> </ol>                                                                                                                                                                                                                                                                                                                                                                                   |
| 2012 | <ol style="list-style-type: none"> <li>1. Chronic disease cases: select the highest 60th percentile based on medical expenses</li> <li>2. Non-chronic disease cases: select the highest 20th percentile based on medical expenses</li> <li>3. Participants in FPICP 2011</li> <li>4. High utilization cases in outpatient clinics: patients with outpatient visits in primary clinics <math>\geq 50</math> times</li> <li>5. Elderly patients over 75 years old</li> <li>6. Participants in other pay-for-performance (P4P) programs (referring to diabetes, asthma, hepatitis B or C, chronic kidney disease, etc.)</li> </ol> |
| 2013 | <ol style="list-style-type: none"> <li>1. Chronic disease cases: select the highest 70th percentile based on medical expenses</li> <li>2. Non-chronic disease cases: select the highest 30th percentile based on medical expenses</li> <li>3. High-utilization cases in outpatient clinics: patients with outpatient visits to primary clinics <math>\geq 50</math> times</li> <li>4. Elderly patients over 75 years old</li> <li>5. Participants in other pay-for-performance (P4P) programs (referring to diabetes, asthma, hepatitis B or C, chronic kidney disease, etc.)</li> </ol>                                        |
| 2014 | <ol style="list-style-type: none"> <li>1. Chronic disease cases: select the highest 80th percentile based on medical expenses</li> <li>2. Non-chronic disease cases: select the highest 30th percentile based on medical expenses</li> <li>3. High-utilization cases in outpatient clinics: patients with outpatient visits to primary clinics <math>\geq 50</math> times</li> <li>4. Elderly patients over 65 years of age with multiple chronic diseases</li> <li>5. Participants in other pay-for-performance (P4P) programs (referring to diabetes, asthma, hepatitis B or C, chronic kidney disease, etc.)</li> </ol>      |
| 2015 | <ol style="list-style-type: none"> <li>1. Chronic disease cases: select the highest 85th percentile based on medical expenses</li> <li>2. Non-chronic disease cases: select the highest 30th percentile based on medical expenses</li> <li>3. High-utilization cases in outpatient clinics: patients with outpatient visits to primary clinics <math>\geq 50</math> times</li> <li>4. Elderly patients over 65 years of age with multiple chronic diseases</li> <li>5. Participants in other pay-for-performance (P4P) programs (referring to diabetes, asthma, hepatitis B or C, chronic kidney disease, etc.)</li> </ol>      |

\* Chronic diseases: refer to the List of chronic diseases reimbursed by National Health Insurance Administration (**Appendix 7.**)

## Appendix 7. List of chronic diseases reimbursed by National Health Insurance Administration

| Disease name | ICD-9-CM reference code | ICD-10-CM/PCS reference code | Remarks                                        |
|--------------|-------------------------|------------------------------|------------------------------------------------|
| 1. Cancer    | 150.0-162.9             | C153-C3492                   |                                                |
|              |                         | C451                         |                                                |
|              |                         | C480-C488                    |                                                |
|              |                         | C7A010-C7A090                |                                                |
|              |                         | C7A092                       |                                                |
|              | 163.0-176.9             | C37-C50929                   | Contains C4A0-C4A9                             |
|              |                         | C7A091                       |                                                |
|              |                         | D030-D039                    |                                                |
|              | 180.0-188.9             | C510-C549                    |                                                |
|              |                         | C561-C639                    |                                                |
|              |                         | C670-C679                    |                                                |
|              | 189.0-189.9             | C641-C669                    |                                                |
|              |                         | C680-C689                    |                                                |
|              |                         | C7A093                       |                                                |
|              | 191.0-191.9             | C710-C719                    |                                                |
|              |                         | C457                         |                                                |
|              | 192.0-201.07            | C459                         |                                                |
|              |                         | C700-C709                    |                                                |
|              |                         | C720-C759                    |                                                |
|              |                         | C7A00                        |                                                |
|              |                         | C7A094-C7A096                |                                                |
|              |                         | C7A1-C7B8                    |                                                |
|              |                         | C884                         |                                                |
|              |                         | C800-C801                    |                                                |
|              |                         | C8170-C8170                  |                                                |
|              |                         | C8300-C8309                  |                                                |
|              |                         | C8330-C8399                  |                                                |
|              |                         | C8460-C8479                  |                                                |
|              |                         | C8520-C8529                  |                                                |
|              |                         | C865-C866                    |                                                |
|              |                         | C964-C965                    |                                                |
|              | 201.00-201.98           | C8100-C8199                  |                                                |
|              | 204.00-208.91           | C9100-C9132                  |                                                |
|              |                         | C9150-C9432                  | Contains C91A0-C91Z2, C92A0-C92Z2, C93Z0-C93Z2 |
|              |                         | C9480-C9592                  |                                                |
|              |                         | D45                          |                                                |
|              | 200.00-200.88           | C8300-C8309                  |                                                |
|              |                         | C8330-C8399                  |                                                |

|                                             |               |               |                                                                               |
|---------------------------------------------|---------------|---------------|-------------------------------------------------------------------------------|
|                                             |               | C8460-C8479   |                                                                               |
|                                             |               | C8520-C8529   |                                                                               |
|                                             |               | C865-C866     |                                                                               |
|                                             | 202.00-203.81 | C8200-C8299   |                                                                               |
|                                             |               | C8310-C8339   |                                                                               |
|                                             |               | C8380-C8389   |                                                                               |
|                                             |               | C8400-C8449   |                                                                               |
|                                             |               | C84A0-C864    | Contains C84A0-C84Z9                                                          |
|                                             |               | C882-C9032    |                                                                               |
|                                             |               | C9140-C9142   |                                                                               |
|                                             |               | C960-C964     |                                                                               |
|                                             |               | C96A-C969     | Contains C96A-C96Z                                                            |
|                                             | 140.0-149.9   | C000-C148     |                                                                               |
|                                             | 230.0-234.9   | D0000-D024    |                                                                               |
|                                             |               | D040-D099     |                                                                               |
| <b>2. Endocrine and metabolic diseases</b>  |               |               |                                                                               |
|                                             | 240.0-246.9   | E000-E079     |                                                                               |
| Thyroid Dysfunction                         |               | E35           |                                                                               |
|                                             |               | E890          |                                                                               |
| Diabetes                                    | 250.00-250.91 | E0800-E139    |                                                                               |
| Hyperlipidemia                              | 272.0-272.1   | E780-E781     |                                                                               |
| Wilson's Disease                            |               | C880          |                                                                               |
| Gout                                        |               | C965-C966     |                                                                               |
| Pemphigus                                   |               | D472          |                                                                               |
| Dermatomyositis                             |               | D800-D849     |                                                                               |
| Hyperprolactin                              |               | D890-D899     |                                                                               |
| Congenital metabolic disorders              |               | E201          |                                                                               |
| Adrenal diseases with endocrine disorders   |               | E65-E749      |                                                                               |
| Pituitary diseases with endocrine disorders |               | E7521-E7522   |                                                                               |
| Precocious puberty                          |               | E75240-E75249 |                                                                               |
| Hypoparathyroidism                          |               | E753          |                                                                               |
| Hypogonadism                                |               | E755-E756     |                                                                               |
| Congenital immune deficiency                |               | E7601-E789    |                                                                               |
|                                             | 270.0-279.9   | E791-E8319    |                                                                               |
|                                             |               | E8330-E889    | Wilson's disease: E8301                                                       |
|                                             |               | H49811-H49819 |                                                                               |
|                                             |               | J8482         |                                                                               |
|                                             |               | M1A00X0-M109  | Contains M1A00X0-M1A9XX1<br>Chronic gout: M1A00X0-M1A9XX1<br>Gout: M1000-M109 |
|                                             |               | M359          |                                                                               |
|                                             |               | N200          |                                                                               |

|                                |               |               |  |
|--------------------------------|---------------|---------------|--|
|                                | 251.0-259.9   | E15-E200      |  |
|                                |               | E208-E35      |  |
|                                |               | E891-E896     |  |
|                                |               | N981          |  |
| <b>3. Psychiatric diseases</b> | 290.0-301.9   | F0150-F068    |  |
|                                |               | F10121        |  |
|                                |               | F1014-F1019   |  |
|                                |               | F10221        |  |
|                                |               | F10230-F1099  |  |
|                                |               | F11121-F11122 |  |
|                                |               | F1114-F1119   |  |
|                                |               | F11220-F1199  |  |
|                                |               | F12120-F1219  |  |
|                                |               | F12220-F1229  |  |
|                                |               | F12920-F1299  |  |
|                                |               | F13121-F1319  |  |
|                                |               | F13220-F1399  |  |
|                                |               | F14121-F1419  |  |
|                                |               | F14220-F1499  |  |
|                                |               | F15121-F1519  |  |
|                                |               | F15220-F1599  |  |
|                                |               | F16121-F1619  |  |
|                                |               | F16220-F1699  |  |
|                                |               | F17203-F17209 |  |
|                                |               | F17213-F17219 |  |
|                                |               | F17223-F17229 |  |
|                                |               | F17293-F17299 |  |
|                                |               | F18120-F1819  |  |
|                                |               | F18220-F1829  |  |
|                                |               | F18920-F1899  |  |
|                                |               | F19121-F1919  |  |
|                                |               | F1921-F42     |  |
|                                |               | F440-F489     |  |
|                                |               | F53           |  |
|                                |               | F600-F609     |  |
|                                |               | F6810-F69     |  |
|                                |               | F840          |  |
|                                |               | F843-F849     |  |
|                                |               | F99           |  |
|                                |               | R452          |  |
|                                |               | R455-R456     |  |
|                                |               | R4586         |  |
|                                | 305.00-305.93 | F1010-F10120  |  |
|                                |               | F10129        |  |

|                                                                                      |             |               |  |
|--------------------------------------------------------------------------------------|-------------|---------------|--|
|                                                                                      |             | F1110-F11120  |  |
|                                                                                      |             | F11129        |  |
|                                                                                      |             | F1190         |  |
|                                                                                      |             | F1210         |  |
|                                                                                      |             | F1290         |  |
|                                                                                      |             | F1310-F13120  |  |
|                                                                                      |             | F1390         |  |
|                                                                                      |             | F1410-F14120  |  |
|                                                                                      |             | F1490         |  |
|                                                                                      |             | F1510-F15120  |  |
|                                                                                      |             | F1590         |  |
|                                                                                      |             | F1610-F16120  |  |
|                                                                                      |             | F1690         |  |
|                                                                                      |             | F17200-F17201 |  |
|                                                                                      |             | F17210-F17211 |  |
|                                                                                      |             | F17220-F17221 |  |
|                                                                                      |             | F17290-F17291 |  |
|                                                                                      |             | F1810-F18120  |  |
|                                                                                      |             | F1890         |  |
|                                                                                      |             | F1910-F19120  |  |
|                                                                                      |             | F1990         |  |
|                                                                                      |             | F550-F558     |  |
|                                                                                      | 307.0-316   | F070-F09      |  |
|                                                                                      |             | F329          |  |
|                                                                                      |             | F430-F439     |  |
|                                                                                      |             | F4541-F4542   |  |
|                                                                                      |             | F482          |  |
|                                                                                      |             | F5000-F519    |  |
|                                                                                      |             | F54           |  |
|                                                                                      |             | F630-F639     |  |
|                                                                                      |             | F800-F82      |  |
|                                                                                      |             | F88-F989      |  |
|                                                                                      |             | G44201-G44229 |  |
|                                                                                      |             | G4720-G4729   |  |
|                                                                                      |             | H9325         |  |
| <b>4. Nervous system diseases</b>                                                    |             |               |  |
| Brain tumor complicated by neurological dysfunction                                  | 225.0-225.9 | D320-D339     |  |
| Parkinson's disease                                                                  | 332.0-332.1 | G20-G219      |  |
| Myotonic dystrophy<br>Other central nervous system degeneration and genetic diseases | 330.0-336.9 | E7500-E7519   |  |
|                                                                                      |             | E7523         |  |
|                                                                                      |             | E7525-E7529   |  |
|                                                                                      |             | E754          |  |
|                                                                                      |             | F842          |  |

|                                                        |               |               |                        |
|--------------------------------------------------------|---------------|---------------|------------------------|
|                                                        |               | G10-G129      |                        |
|                                                        |               | G132-G138     |                        |
|                                                        |               | G20-G3281     |                        |
|                                                        |               | G803          |                        |
|                                                        |               | G903          |                        |
|                                                        |               | G910-G919     |                        |
|                                                        |               | G937          |                        |
|                                                        |               | G9389-G939    |                        |
|                                                        |               | G94-G959      |                        |
|                                                        |               | G992          |                        |
| Multiple Sclerosis                                     | 340           | G35           |                        |
| Infantile cerebral palsy and other paralytic syndromes | 343.0-344.9   | G041          |                        |
|                                                        |               | G800-G809     |                        |
|                                                        |               | G8220-G839    |                        |
| Epilepsy                                               | 345.00-345.91 | G40001-G40919 | Contains G40A01-G40B19 |
| Myasthenia Gravis                                      | 323.0-326     | G0400-G09     |                        |
|                                                        |               | G373-G374     |                        |
|                                                        |               | G92           |                        |
|                                                        | 337.0-342.9   | G35-G379      |                        |
|                                                        |               | G8100-G8194   |                        |
|                                                        |               | G9001-G9009   |                        |
|                                                        |               | G902          |                        |
|                                                        |               | G904-G909     |                        |
|                                                        |               | G990          |                        |
|                                                        | 346.00-359.9  | E0842         |                        |
|                                                        |               | E0942         |                        |
|                                                        |               | E1040         |                        |
|                                                        |               | E1042         |                        |
|                                                        |               | E1140         |                        |
|                                                        |               | E1142         |                        |
|                                                        |               | E1342         |                        |
|                                                        |               | G130-G131     |                        |
|                                                        |               | G3289         |                        |
|                                                        |               | G43009-G44049 | Contains G43A0-G43D1   |
|                                                        |               | G4451         |                        |
|                                                        |               | G47411-G47429 |                        |
|                                                        |               | G500-G737     |                        |
|                                                        |               | G92-G936      |                        |
|                                                        |               | G9381-G939    |                        |
|                                                        |               | G960-G969     |                        |
|                                                        |               | G971          |                        |

|                                                                                                         |               |               |                            |
|---------------------------------------------------------------------------------------------------------|---------------|---------------|----------------------------|
|                                                                                                         |               | G9782         |                            |
|                                                                                                         |               | G980-G988     |                            |
|                                                                                                         |               | G998          |                            |
|                                                                                                         |               | I6783         |                            |
| Multiple peripheral neuropathy<br>Plexopathy<br>Trigeminal neuropathy<br>Migraine<br>Spinal cord injury | 323.0-326     | G0400-G09     |                            |
|                                                                                                         |               | G373-G374     |                            |
|                                                                                                         |               | G92           |                            |
|                                                                                                         | 337.0-337.9   | G9001-G9009   |                            |
|                                                                                                         |               | G902          |                            |
|                                                                                                         |               | G904-G909     |                            |
|                                                                                                         |               | G990          |                            |
|                                                                                                         | 341.0-342.9   | G360-G379     |                            |
|                                                                                                         |               | G8100-G8194   |                            |
|                                                                                                         | 346.00-359.9  | E0842         |                            |
|                                                                                                         |               | E0942         |                            |
|                                                                                                         |               | E1040         |                            |
|                                                                                                         |               | E1042         |                            |
|                                                                                                         |               | E1140         |                            |
|                                                                                                         |               | E1142         |                            |
|                                                                                                         |               | E1342         |                            |
|                                                                                                         |               | G130-G131     |                            |
|                                                                                                         |               | G3289         |                            |
|                                                                                                         |               | G43009-G44049 | Contains G43A0-G43D1       |
|                                                                                                         |               | G4451         | Contains G43001 (Migraine) |
|                                                                                                         |               | G47411-G47429 |                            |
|                                                                                                         |               | G500-G737     |                            |
|                                                                                                         |               | G92-G936      |                            |
|                                                                                                         |               | G9381-G939    |                            |
|                                                                                                         |               | G960-G969     |                            |
|                                                                                                         |               | G971          |                            |
|                                                                                                         |               | G9782         |                            |
|                                                                                                         |               | G980-G988     |                            |
| G998                                                                                                    |               |               |                            |
| I6783                                                                                                   |               |               |                            |
| 5. Circulatory system diseases                                                                          |               |               |                            |
| Heart disease                                                                                           | 393-398.99    | I050-I099     |                            |
|                                                                                                         | 410.00-410.92 | I2101-I229    |                            |
|                                                                                                         |               |               |                            |
|                                                                                                         | 411.0-414.9   | I200-I209     |                            |
|                                                                                                         |               | I240-I259     |                            |
|                                                                                                         | 427.0-427.9   | I462-I499     |                            |
|                                                                                                         |               | R001          |                            |
| 428.0-429.9                                                                                             | I230-I238     |               |                            |

|                                                              |               |                    |  |
|--------------------------------------------------------------|---------------|--------------------|--|
|                                                              |               | I2510              |  |
|                                                              |               | I501-I52           |  |
|                                                              |               | I970-I97191        |  |
| Hypertension                                                 | 402.00-402.91 | I110-I119          |  |
|                                                              | 405.01-405.99 | I150-I159          |  |
|                                                              |               | N262               |  |
| Cerebrovascular disease                                      | 430-434.9     | I6000-I669         |  |
|                                                              | 436           | I6789              |  |
|                                                              | 437.0         | I672               |  |
| Atherosclerosis                                              | 440.0-440.9   | I700-I7092         |  |
|                                                              |               | I75011-I7589       |  |
| Arterial embolism and thrombosis                             | 444.0-444.9   | I7401-I749         |  |
| Raynaud's disease                                            | 441.0-443.9   | I7100-I739         |  |
| Kawasaki disease complicated by cardiovascular abnormalities |               | I7771-I7779        |  |
|                                                              |               | I790-I798          |  |
|                                                              | 446.0-448.9   | I770-I776          |  |
|                                                              |               | I7789-I789         |  |
|                                                              |               | M300-M319          |  |
| <b>6. Respiratory diseases</b>                               |               |                    |  |
| Chronic sinusitis                                            | 472.0-473.9   | J310-J329          |  |
|                                                              |               | R0982              |  |
| Chronic bronchitis                                           |               |                    |  |
| Emphysema                                                    | 490-493.91    | J40-J45998         |  |
| Asthma                                                       |               |                    |  |
| Bronchiectasis                                               | 500-508.9     | J60-J668 J680-J709 |  |
| Pulmonaryosis                                                |               |                    |  |
| Lung disease caused by external causes                       |               |                    |  |
| Chronic obstructive pulmonary disease                        | 495.0-496     | J449               |  |
|                                                              |               | J670-J679          |  |
| Allergic rhinitis                                            | 475-478.9     | J300-J309          |  |
|                                                              |               | J340-J349          |  |
|                                                              |               | J36-J399           |  |
|                                                              |               | R0981              |  |
| <b>7. Digestive system diseases</b>                          |               |                    |  |
| Peptic ulcer                                                 | 531.00-533.91 | K250-K279          |  |
| Cirrhosis of the liver                                       | 571.0-571.9   | K700-K709          |  |
| Chronic hepatitis                                            |               | K730-K7469         |  |
|                                                              |               | K754-K7581         |  |
|                                                              |               | K760               |  |
|                                                              |               | K7689-K769         |  |
|                                                              | 534.00-537.9  | K280-K316          |  |

|                                                     |             |             |  |
|-----------------------------------------------------|-------------|-------------|--|
| Gastrointestinal dysfunction<br>Chronic cholangitis |             | K31811-K319 |  |
|                                                     |             | K5281       |  |
|                                                     |             | K9420-K9429 |  |
|                                                     |             | R1110       |  |
|                                                     | 555.0-558.9 | K5000-K559  |  |
|                                                     |             | K9281       |  |
|                                                     | 565.0-570   | K5520-K5521 |  |
|                                                     |             | K600-K639   |  |
|                                                     |             | K650-K67    |  |
|                                                     |             | K6811       |  |
|                                                     |             | K6819-K689  |  |
|                                                     |             | K7200-K7201 |  |
|                                                     |             | K762        |  |
|                                                     |             | K91858      |  |
|                                                     |             | K9289-K929  |  |
|                                                     |             | K9400-K9419 |  |
|                                                     |             | N994        |  |
|                                                     |             | R1113       |  |
|                                                     |             | R188        |  |
|                                                     | 572.0-573.9 | K710-K719   |  |
|                                                     |             | K7210-K7291 |  |
|                                                     |             | K750-K759   |  |
|                                                     |             | K761        |  |
|                                                     |             | K763-K77    |  |
|                                                     | 575.9-579.9 | K829-K904   |  |
|                                                     |             | K9089-K909  |  |
|                                                     |             | K912        |  |
|                                                     |             | K915        |  |
|                                                     |             | K920-K922   |  |
| <b>8. Urinary system diseases</b>                   |             |             |  |
| Chronic nephritis                                   | 580.0-589.9 | E1021       |  |
|                                                     |             | E1121       |  |
|                                                     |             | N000-N08    |  |
|                                                     |             | N140-N150   |  |
|                                                     |             | N158-N19    |  |
|                                                     |             | N250-N261   |  |
|                                                     |             | N269-N279   |  |
| Kidney infection                                    | 590.0-590.9 | N10-N12     |  |
|                                                     |             | N136        |  |
|                                                     |             | N151        |  |
|                                                     |             | N159-N16    |  |

|                                                                        |               |               |                       |
|------------------------------------------------------------------------|---------------|---------------|-----------------------|
|                                                                        |               | N2884-N2886   |                       |
| <b>9. Diseases of the musculoskeletal system and connective tissue</b> |               |               |                       |
| Arthritis                                                              | 711.39-720.0  | M01X0-M0209   | Contains M01X0-M01X9  |
|                                                                        |               | M0219-M0229   |                       |
|                                                                        |               | M0280-M0899   |                       |
|                                                                        |               | M1100-M1993   |                       |
|                                                                        |               | M2200-M24176  |                       |
|                                                                        |               | M2430-M25676  |                       |
|                                                                        |               | M2580-M259    |                       |
|                                                                        |               | M361-M364     |                       |
|                                                                        |               | M433-M435X9   |                       |
|                                                                        |               | M450-M459     |                       |
|                                                                        |               | M488X1-M488X9 |                       |
|                                                                        |               | M532X1-M532X9 |                       |
|                                                                        |               | M79646        |                       |
|                                                                        |               | Q686          |                       |
|                                                                        |               | R262          |                       |
|                                                                        |               | R294          |                       |
|                                                                        | 725-729.9     | D481          |                       |
|                                                                        |               | G4762         |                       |
|                                                                        |               | K6812         |                       |
|                                                                        |               | M2010         |                       |
|                                                                        |               | M2420-M2428   |                       |
|                                                                        |               | M2570-M25776  |                       |
|                                                                        |               | M353-M357     |                       |
|                                                                        |               | M5410         |                       |
|                                                                        |               | M5418         |                       |
|                                                                        |               | M60000-M6282  |                       |
|                                                                        |               | M62831-M799   | Contains M79A11-M79A9 |
|                                                                        |               | R252          |                       |
|                                                                        |               | R29898        |                       |
| Polymyositis                                                           | 710.0-713.8   | M0000-M029    | Contains M01X0-M01X9  |
|                                                                        |               | M1100-M119    |                       |
|                                                                        |               | M1280         |                       |
|                                                                        |               | M1460-M1489   |                       |
|                                                                        |               | M320-M352     |                       |
|                                                                        |               | M355          |                       |
|                                                                        |               | M358-M368     |                       |
|                                                                        | 715.00-716.99 | M0760-M0769   |                       |
|                                                                        |               | M1210-M1219   |                       |
|                                                                        |               | M1250-M1259   |                       |
|                                                                        |               | M1280-M1389   |                       |

|                                                                                                        |               |               |                                       |
|--------------------------------------------------------------------------------------------------------|---------------|---------------|---------------------------------------|
|                                                                                                        |               | M150-M1993    |                                       |
| Osteoporosis<br>Lupus Erythematosus                                                                    | 731.0-733.99  | H61031-H61039 |                                       |
|                                                                                                        |               | M4200-M429    |                                       |
|                                                                                                        |               | M4850X-M4858  | The 7th character is "A"              |
|                                                                                                        |               | M8000X-M8088X | The 7th character is "A", "K", or "P" |
|                                                                                                        |               | M810-M818     |                                       |
|                                                                                                        |               | M8430X-M8468X | The 7th character is "A", "K", or "P" |
|                                                                                                        |               | M8480-M949    |                                       |
|                                                                                                        | 737.0-739.9   | M2110         |                                       |
|                                                                                                        |               | M21179        |                                       |
|                                                                                                        |               | M4000-M419    |                                       |
|                                                                                                        |               | M4300-M4319   |                                       |
|                                                                                                        |               | M438X1-M439   |                                       |
|                                                                                                        |               | M8938         |                                       |
|                                                                                                        |               | M898X8        |                                       |
|                                                                                                        |               | M950-M959     |                                       |
|                                                                                                        |               | M962-M965     |                                       |
|                                                                                                        |               | M9900-M9909   |                                       |
|                                                                                                        |               | M9980-M999    |                                       |
|                                                                                                        |               |               |                                       |
|                                                                                                        |               |               |                                       |
| Chronic osteomyelitis                                                                                  | 730.00-730.99 | M4620-M4639   |                                       |
|                                                                                                        |               | M8600-M869    |                                       |
|                                                                                                        |               | M8960-M8969   |                                       |
|                                                                                                        |               | M9080-M9089   |                                       |
| <b>10. Diseases of the eye and its accessory organs</b>                                                |               |               |                                       |
| Glaucoma                                                                                               | 365.00-365.9  | H40001-H42    |                                       |
|                                                                                                        |               | Q150          |                                       |
| Dry eye syndrome                                                                                       | 375.00-375.9  | H04001-H049   |                                       |
| Retinal degeneration<br>Macular degeneration<br>Uveitis<br>Vitreous hemorrhage<br>Corneal degeneration | 360.00-364.9  | E11311-E11359 |                                       |
|                                                                                                        |               | G453          |                                       |
|                                                                                                        |               | H16241-H16249 |                                       |
|                                                                                                        |               | H2000-H22     |                                       |
|                                                                                                        |               | H30001-H36    |                                       |
|                                                                                                        |               | H44001-H449   |                                       |
|                                                                                                        | 367.0-368.9   | H5200-H539    |                                       |
|                                                                                                        |               | R441          |                                       |
|                                                                                                        |               | R483          |                                       |
|                                                                                                        | 370.00-371.9  | H16001-H16239 |                                       |
|                                                                                                        |               | H16251-H189   |                                       |
|                                                                                                        | 372.4-374.9   | H00011-H029   |                                       |
|                                                                                                        |               | H10811-H10819 |                                       |
|                                                                                                        |               | H11001-H119   |                                       |

|                                                                                                                                                                                                                                                                                                                                                                                                                                                                                |               |             |  |
|--------------------------------------------------------------------------------------------------------------------------------------------------------------------------------------------------------------------------------------------------------------------------------------------------------------------------------------------------------------------------------------------------------------------------------------------------------------------------------|---------------|-------------|--|
|                                                                                                                                                                                                                                                                                                                                                                                                                                                                                | 376.00-377.9  | H0500-H059  |  |
|                                                                                                                                                                                                                                                                                                                                                                                                                                                                                |               | H4600-H479  |  |
|                                                                                                                                                                                                                                                                                                                                                                                                                                                                                | 379.00-379.99 | H15001-H159 |  |
|                                                                                                                                                                                                                                                                                                                                                                                                                                                                                |               | H2700-H279  |  |
|                                                                                                                                                                                                                                                                                                                                                                                                                                                                                |               | H4300-H439  |  |
|                                                                                                                                                                                                                                                                                                                                                                                                                                                                                |               | H5500-H579  |  |
|                                                                                                                                                                                                                                                                                                                                                                                                                                                                                |               | H5940-H5943 |  |
| <b>11. Infectious diseases</b>                                                                                                                                                                                                                                                                                                                                                                                                                                                 |               |             |  |
| Tuberculosis                                                                                                                                                                                                                                                                                                                                                                                                                                                                   | 010.00-016.96 | A150-A1818  |  |
|                                                                                                                                                                                                                                                                                                                                                                                                                                                                                |               | A1831-A1839 |  |
|                                                                                                                                                                                                                                                                                                                                                                                                                                                                                |               | A1883       |  |
|                                                                                                                                                                                                                                                                                                                                                                                                                                                                                | 017.00-018.96 | A182        |  |
|                                                                                                                                                                                                                                                                                                                                                                                                                                                                                |               | A184-A199   |  |
| Onychomycosis                                                                                                                                                                                                                                                                                                                                                                                                                                                                  | 110.0-118     | B350-B470   |  |
|                                                                                                                                                                                                                                                                                                                                                                                                                                                                                |               | B480-B49    |  |
| <b>12. Congenital malformations</b>                                                                                                                                                                                                                                                                                                                                                                                                                                            |               |             |  |
| Congenital malformations                                                                                                                                                                                                                                                                                                                                                                                                                                                       | 740.0-742.9   | G901        |  |
|                                                                                                                                                                                                                                                                                                                                                                                                                                                                                |               | Q000-Q079   |  |
|                                                                                                                                                                                                                                                                                                                                                                                                                                                                                | 745.0-751.9   | P293        |  |
|                                                                                                                                                                                                                                                                                                                                                                                                                                                                                |               | Q200-Q459   |  |
|                                                                                                                                                                                                                                                                                                                                                                                                                                                                                | 754.30-756.9  | Q6500-Q669  |  |
|                                                                                                                                                                                                                                                                                                                                                                                                                                                                                |               | Q676-Q678   |  |
|                                                                                                                                                                                                                                                                                                                                                                                                                                                                                |               | Q681-Q76419 |  |
|                                                                                                                                                                                                                                                                                                                                                                                                                                                                                |               | Q7649-Q799  |  |
|                                                                                                                                                                                                                                                                                                                                                                                                                                                                                |               | Q870        |  |
| <b>13. Skin and subcutaneous tissue diseases</b>                                                                                                                                                                                                                                                                                                                                                                                                                               |               |             |  |
| Psoriasis<br>Systemic eczema<br>Black foot disease<br>Vitiligo<br>Seborrheic dermatitis<br>Amyloidosis (limited to lesions exceeding 30% of the body surface area)<br>Pemphigoid<br>Herpetic dermatitis<br>Familial benign chronic pemphigus<br>Epidermolytic vesicular disease<br>Severe ichthyosis (including lamellar ichthyosis and ichthyosis-like erythroderma )<br>Keratosis follicularis<br>Progressive systemic scleroderma<br>Chronic urticaria<br>Atopic dermatitis | 690-709.9     | L00         |  |
|                                                                                                                                                                                                                                                                                                                                                                                                                                                                                |               | L100-L759   |  |
|                                                                                                                                                                                                                                                                                                                                                                                                                                                                                |               | L80-L97929  |  |
|                                                                                                                                                                                                                                                                                                                                                                                                                                                                                |               | L981-L982   |  |
|                                                                                                                                                                                                                                                                                                                                                                                                                                                                                |               | L98411-L99  |  |
|                                                                                                                                                                                                                                                                                                                                                                                                                                                                                |               |             |  |
|                                                                                                                                                                                                                                                                                                                                                                                                                                                                                |               |             |  |
| <b>14. Diseases of blood and hematopoietic organs</b>                                                                                                                                                                                                                                                                                                                                                                                                                          |               |             |  |
| Chronic anemia                                                                                                                                                                                                                                                                                                                                                                                                                                                                 | 280.0-285.9   | D500-D649   |  |
| Purpura                                                                                                                                                                                                                                                                                                                                                                                                                                                                        | 286.0-289.9   | D474        |  |

|                                               |              |              |                      |
|-----------------------------------------------|--------------|--------------|----------------------|
|                                               |              | D5702        |                      |
|                                               |              | D57212       |                      |
|                                               |              | D57412       |                      |
|                                               |              | D65-D77      |                      |
|                                               |              | D892         |                      |
|                                               |              | I880-I889    |                      |
| Hemophilia                                    | 286.0-289.9  | D474         |                      |
|                                               |              | D5702        |                      |
|                                               |              | D57212       |                      |
|                                               |              | D57412       |                      |
|                                               |              | D57812       |                      |
|                                               |              | D65-D77      |                      |
|                                               |              | D892         |                      |
|                                               |              | I880-I889    |                      |
| Myelodysplastic syndromes                     | 284.9        | D619         |                      |
|                                               | 285.0        | D640-D643    |                      |
|                                               | 205.2        | C9220-C9222  |                      |
|                                               | 205.8        | C92Z0-C92Z2  |                      |
|                                               | 206.1        | C9310-C9312  |                      |
|                                               | 238.7        | C888         |                      |
|                                               |              | C9440-C946   |                      |
|                                               |              | D46A-D469    | Contains D46A-D46Z   |
|                                               |              | D471         |                      |
|                                               |              | D473         |                      |
|                                               |              | D47Z1-D479   | Contains D47Z1-D47Z9 |
| Primary thrombocytosis                        | 238.7        | C888         |                      |
|                                               |              | C9440-C946   |                      |
|                                               |              | D46A-D469    | Contains D46A-D46Z   |
|                                               |              | D471         |                      |
|                                               |              | D473         |                      |
|                                               |              | D47Z1-D479   | Contains D47Z1-D47Z9 |
| 15. Diseases of ear and mastoid               |              |              |                      |
| Chronic otitis media                          | 381.00-383.9 | H6500-H7093  |                      |
|                                               |              | H7500-H7583  |                      |
|                                               |              | H9500-H95199 |                      |
| Vestibular disorders<br>Neurological tinnitus | 384.00-388.9 | G960         |                      |
|                                               |              | H7100-H7493  |                      |
|                                               |              | H8000-H8393  |                      |
|                                               |              | H9110-H918X9 |                      |
|                                               |              | H9201-H93249 |                      |
|                                               |              | H93291-H9483 |                      |
|                                               | 380.00-380.9 | H6000-H628X9 |                      |

|                                                 |             |               |  |
|-------------------------------------------------|-------------|---------------|--|
| <b>16. Other</b>                                |             |               |  |
| Follow-up treatment after organ transplantation | V63.0-V68.9 | Z0271-Z0279   |  |
|                                                 |             | Z0289-Z029    |  |
|                                                 |             | Z048-Z049     |  |
|                                                 |             | Z08-Z09       |  |
|                                                 |             | Z2801-Z2829   |  |
|                                                 |             | Z2881-Z289    |  |
|                                                 |             | Z322-Z323     |  |
|                                                 |             | Z4681         |  |
|                                                 |             | Z515          |  |
|                                                 |             | Z5189         |  |
|                                                 |             | Z5301-Z539    |  |
|                                                 |             | Z6981         |  |
|                                                 |             | Z700-Z719     |  |
|                                                 |             | Z750-Z760     |  |
|                                                 |             | Z763-Z7681    |  |
|                                                 |             | Z7689         |  |
| Leprosy                                         | 030.0-030.9 | A300-A309     |  |
| Hemorrhoids                                     | 455.0-455.9 | K640-K649     |  |
| Prostate hypertrophy                            | 600         | N400-N403     |  |
|                                                 |             | N4283         |  |
| Endometriosis<br>Perimenopausal syndrome        | 619.0-629.9 | E230          |  |
|                                                 |             | G43821-G43839 |  |
|                                                 |             | N393          |  |
|                                                 |             | N820-N979     |  |
|                                                 |             | N992          |  |
|                                                 |             | N9983         |  |
|                                                 |             | R102          |  |
|                                                 |             | R87612-R87614 |  |
| Urinary incontinence                            | 780.0-787.9 | E035          |  |
|                                                 |             | F518          |  |
|                                                 |             | G44051-G44099 |  |
|                                                 |             | G441          |  |
|                                                 |             | G44301-G4441  |  |
|                                                 |             | G4452-G4489   |  |
|                                                 |             | G4700-G4720   |  |
|                                                 |             | G4730-G4739   |  |
|                                                 |             | G4750-G4761   |  |
|                                                 |             | G4769-G479    |  |
|                                                 |             | G933          |  |
|                                                 |             | H49811-H49813 |  |
|                                                 |             | I96           |  |
|                                                 |             | K522          |  |

|  |             |              |  |
|--|-------------|--------------|--|
|  |             | K5289        |  |
|  |             | L74510-L7452 |  |
|  |             | P926         |  |
|  |             | R000         |  |
|  |             | R002         |  |
|  |             | R008-R012    |  |
|  |             | R040-R079    |  |
|  |             | R093         |  |
|  |             | R0989        |  |
|  |             | R110-R1112   |  |
|  |             | R1114-R159   |  |
|  |             | R17          |  |
|  |             | R1911-R192   |  |
|  |             | R194-R261    |  |
|  |             | R2681-R291   |  |
|  |             | R293         |  |
|  |             | R295-R2991   |  |
|  |             | R400-R402344 |  |
|  |             | R403-R414    |  |
|  |             | R4182        |  |
|  |             | R41842       |  |
|  |             | R4189-R440   |  |
|  |             | R442-R443    |  |
|  |             | R4583-R4584  |  |
|  |             | R4701-R5383  |  |
|  |             | R55-R579     |  |
|  |             | R590-R638    |  |
|  |             | R6521-R6812  |  |
|  |             | R683-R6881   |  |
|  |             | R6883        |  |
|  |             | R6889        |  |
|  |             | R900         |  |
|  | 788.1       | R300         |  |
|  |             | R309         |  |
|  | 788.3-796.9 | B349         |  |
|  |             | E0781        |  |
|  |             | E790         |  |
|  |             | I4581        |  |
|  |             | N393-N39498  |  |
|  |             | O280-O289    |  |
|  |             | P09          |  |
|  |             | R030-R031    |  |
|  |             | R100-R109    |  |
|  |             | R160-R162    |  |
|  |             | R180-R1909   |  |

|                                                    |              |               |                                                                                                    |
|----------------------------------------------------|--------------|---------------|----------------------------------------------------------------------------------------------------|
|                                                    |              | R1930-R1937   |                                                                                                    |
|                                                    |              | R195          |                                                                                                    |
|                                                    |              | R198          |                                                                                                    |
|                                                    |              | R292          |                                                                                                    |
|                                                    |              | R301          |                                                                                                    |
|                                                    |              | R32           |                                                                                                    |
|                                                    |              | R34-R360      |                                                                                                    |
|                                                    |              | R369          |                                                                                                    |
|                                                    |              | R390-R3913    |                                                                                                    |
|                                                    |              | R3915-R399    |                                                                                                    |
|                                                    |              | R6889         |                                                                                                    |
|                                                    |              | R700-R801     |                                                                                                    |
|                                                    |              | R803-R899     |                                                                                                    |
|                                                    |              | R9081-R978    |                                                                                                    |
|                                                    | 798.1-799.0  | R0901-R0902   |                                                                                                    |
|                                                    |              | R99           |                                                                                                    |
|                                                    | 799.2-799.9  | R4189         |                                                                                                    |
|                                                    |              | R448-R450     |                                                                                                    |
|                                                    |              | R453-R454     |                                                                                                    |
|                                                    |              | R4587-R4689   |                                                                                                    |
|                                                    |              | R5381         |                                                                                                    |
|                                                    |              | R64           |                                                                                                    |
|                                                    |              | R6813-R6819   |                                                                                                    |
|                                                    |              | R6882         |                                                                                                    |
|                                                    |              | R6889         |                                                                                                    |
|                                                    |              | R69           |                                                                                                    |
|                                                    |              | R99           |                                                                                                    |
| Yusho disease (polychlorinated biphenyl poisoning) | 905.0-909.9  | S0000X-T889XX | Excludes T07-T1491, T300-T3299 and T8600-T879, except for those of which the 7th character is "S". |
| Chronic prostatitis                                | 601.0-602.9  | N410-N429     |                                                                                                    |
|                                                    |              | N51           |                                                                                                    |
|                                                    | 604.0-604.99 | N451-N454     |                                                                                                    |
|                                                    |              | N51           |                                                                                                    |
|                                                    | 607.0-608.9  | N4340-N448    |                                                                                                    |
|                                                    |              | N476          |                                                                                                    |
|                                                    |              | N480-N539     |                                                                                                    |
|                                                    |              | R102          |                                                                                                    |
